# Supplementary material for: Constructing Enhanced Composite Solid-State Electrolytes with Sb/Nb Co-Doped LLZO and PVDF-HFP
Source: MDPI journal article supplement (doi:10.3390/app14073115), 2024-04-08
Supplement: s1 [file s1]

# Constructing enhanced composite solid-state electrolyte with Sb / Nb co-doped LLZO and PVDF-HFP

Jinhai Cai, Yingjie Liu, Yingying Tan, Wanying Chang, Jingyi Wu, Tong Wu, Chunyan Lai\*

Shanghai Key Laboratory of Materials Protection and Advanced Materials in Electric Power,

Shanghai University of Electric Power, Shanghai 200090, China

\*Corresponding author: Chunyan Lai

E-mail: laichunyan@shiep.edu.cn

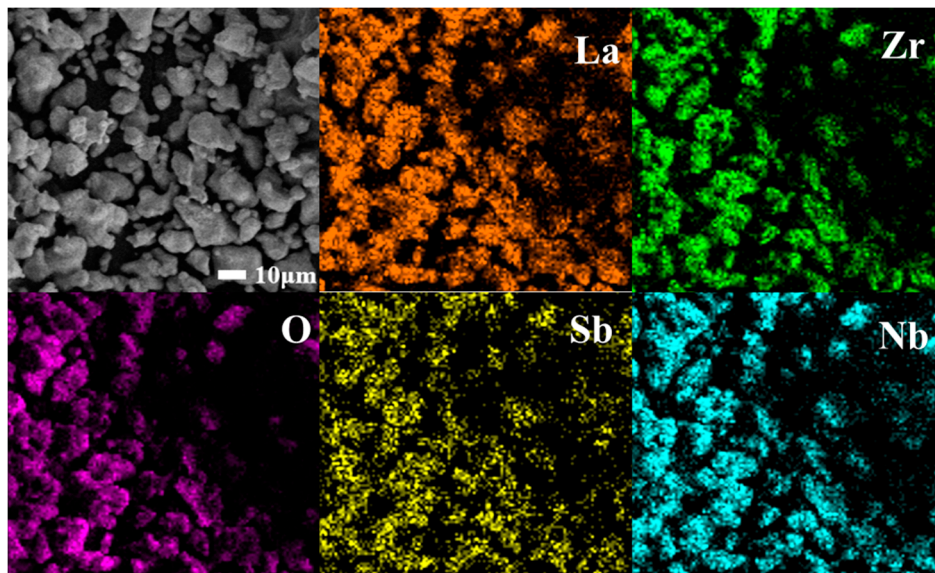

Fig. S1 SEM and EDS mapping of LLZSNO powders.

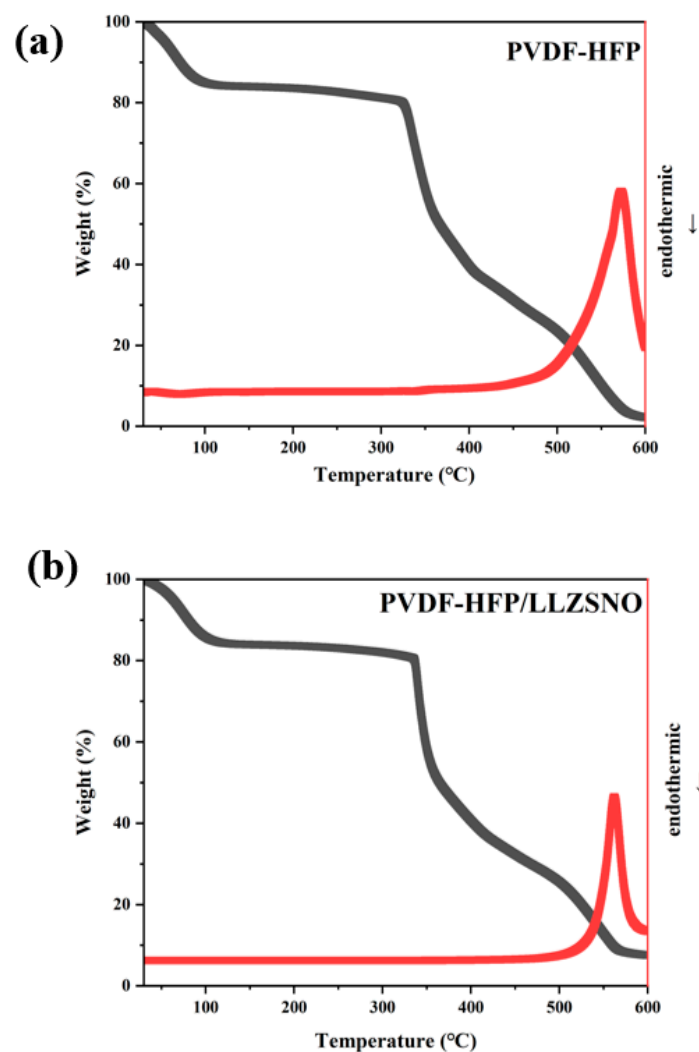

**Fig. S2** TG-DSC synchronous thermal analysis of solid electrolyte (a) PVDF-HFP, (b) PVDF-HFP / LLZSNO.

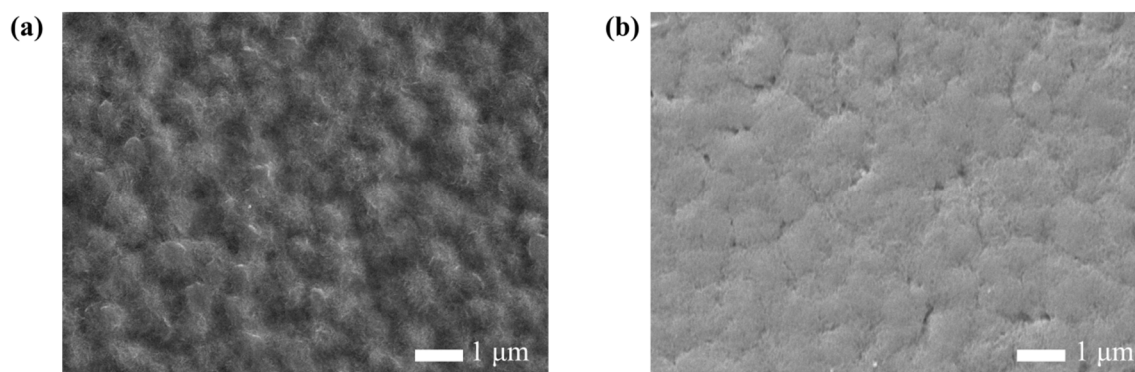

**Fig. S3** SEM images comparison of surface morphology between (a) PVDF-HFP, and (b) PVDF-HFP / LLZSNO.

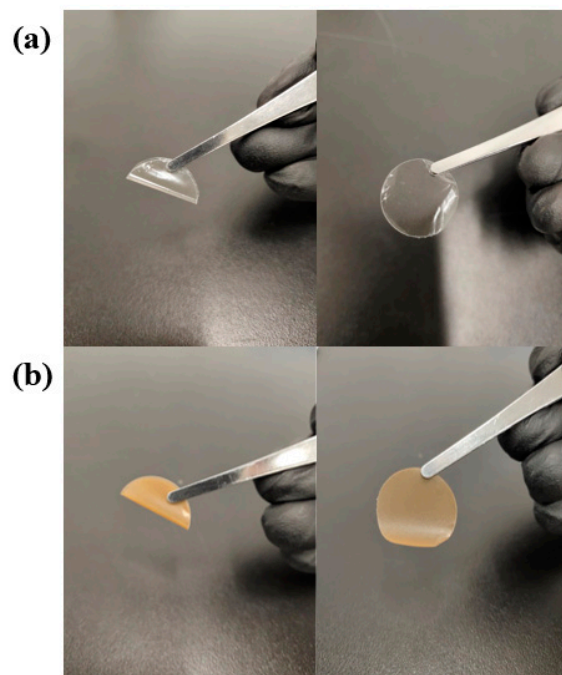

**Fig. S4** Flexibility of (a) Polymer SSE membrane, and (b) CSE membrane.

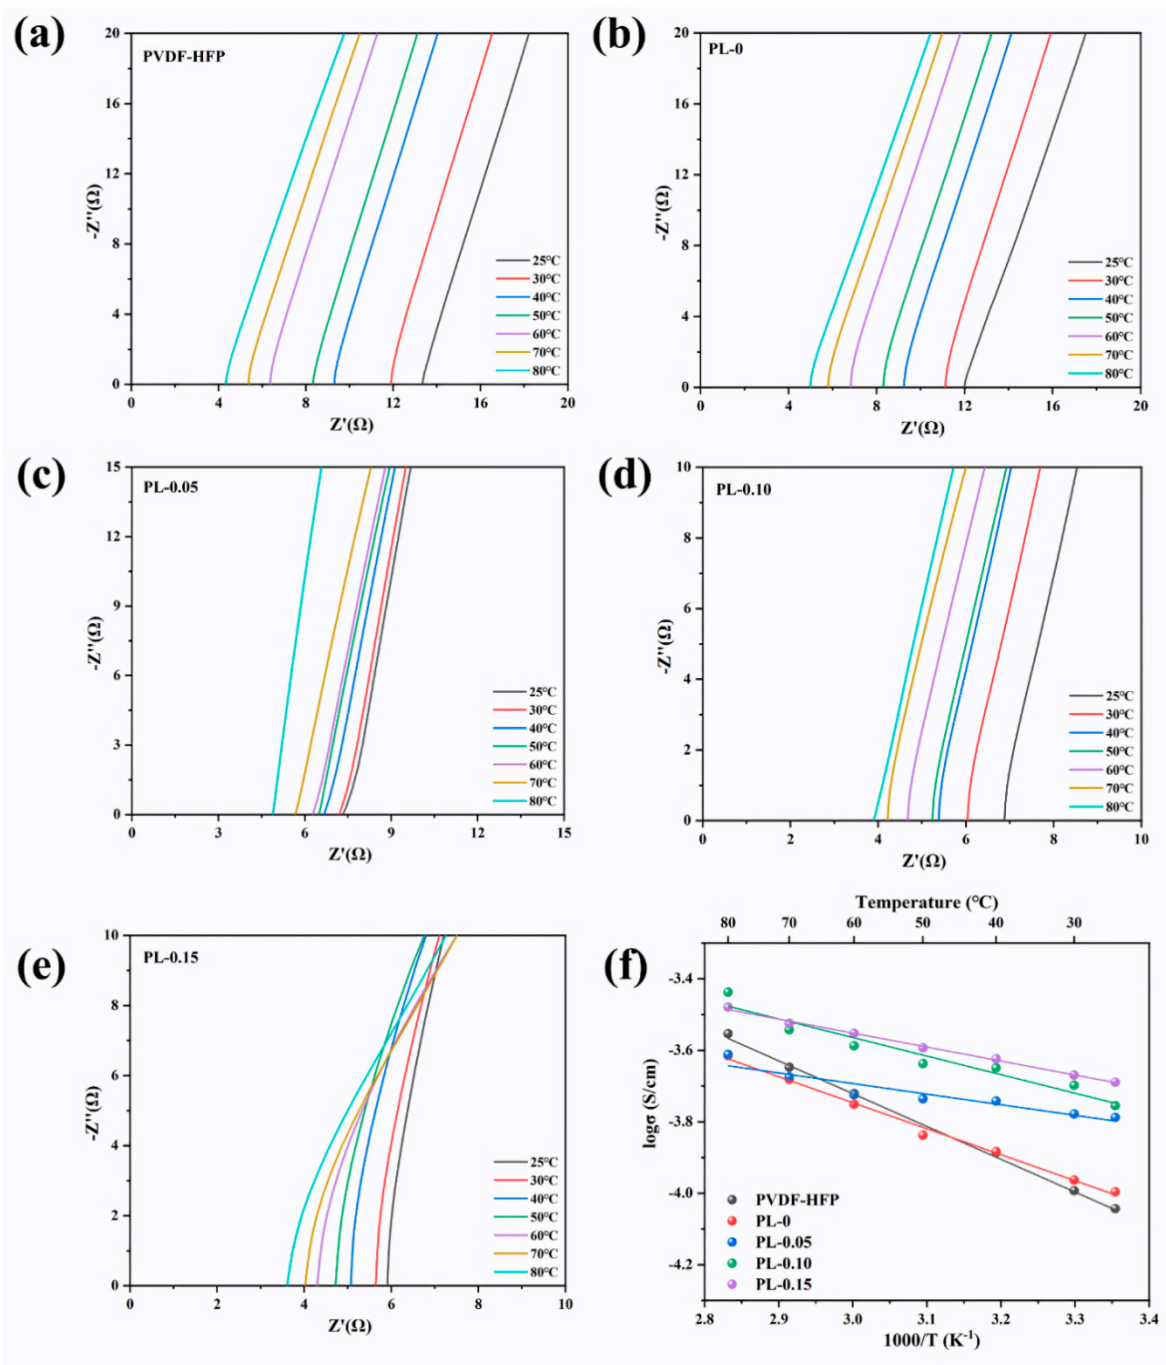

**Fig. S5** (a-e) EIS, and (f) Arrhenius plot of PVDF-HFP and PL-x solid electrolytes.

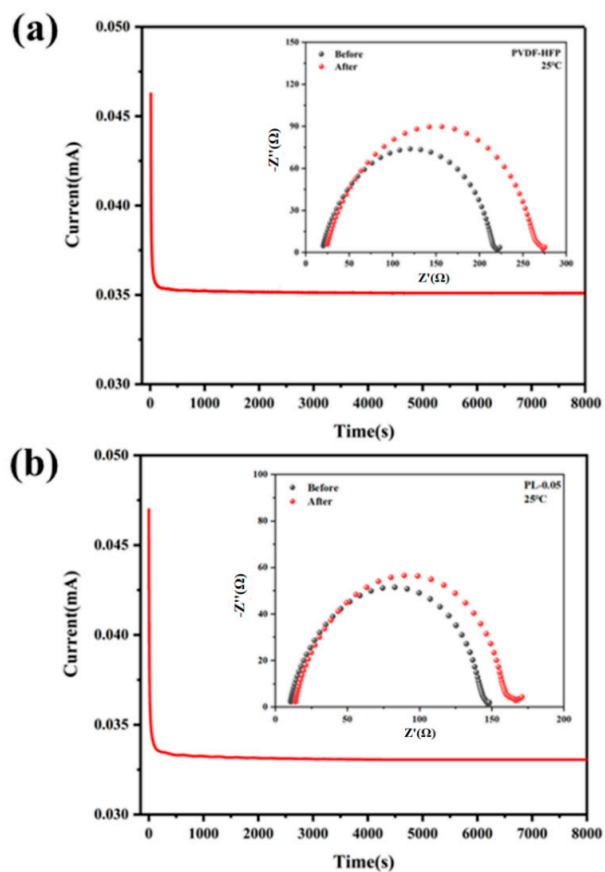

**Fig. S6** EIS and DC polarization curves of (a) PVDF-HFP, and (b) PL-0.05.

**Table S1 Ionic Conductivity and Activation Energy of SSEs at Room Temperature.**

| Sample   | Ionic Conductivity (S / cm,<br>25 °C) | Activation Energy (eV) |
|----------|---------------------------------------|------------------------|
| PVDF-HFP | $9.05 \times 10^{-5}$                 | 0.113                  |
| PL-0     | $1.01 \times 10^{-4}$                 | 0.093                  |
| PL-0.05  | $1.76 \times 10^{-4}$                 | 0.076                  |
| PL-0.10  | $1.63 \times 10^{-4}$                 | 0.082                  |
| PL-0.15  | $1.50 \times 10^{-4}$                 | 0.078                  |
